# Supplementary material
Source: Elsevier journal article supplement (https://www.sciencedirect.com/science/article/pii/S0213911121001424)
Supplement: mmc1 [file S0213911121001424:mmc1.docx]

**Apéndice A**

**Tabla A.I**

Variables socioeconómicas y demográficas independientes, distritos de la ciudad de Madrid, 1 de enero de 2020 (excepto RBDpc 2017)

| **Distritos** | **RBDpc 2017 (€)** | **65+ (%)** | **80+ (%)** | **IE (%)** | **+ ES (%)** | **P/H** | **TPR (%)** |
| --- | --- | --- | --- | --- | --- | --- | --- |
| Centro | 26.084 | 15,68 | 3,15 | 24 | 57,94 | 2,03 | 9,58 |
| Arganzuela | 25.549 | 19,49 | 3,80 | 14 | 53,53 | 2,37 | 8,12 |
| Retiro | 28.904 | 25,97 | 5,04 | 11 | 65,92 | 2,45 | 6,83 |
| Salamanca | 29.439 | 23,86 | 5,28 | 17 | 68,12 | 2,33 | 6,43 |
| Chamartín | 29.386 | 23,35 | 4,91 | 13 | 70,26 | 2,51 | 6,35 |
| Tetuán | 21.739 | 19,06 | 4,31 | 27 | 48,10 | 2,40 | 9,63 |
| Chamberí | 29.024 | 24,09 | 5,35 | 14 | 69,06 | 2,25 | 6,65 |
| Fuencarral-El Pardo | 23.580 | 20,81 | 3,28 | 13 | 57,11 | 2,73 | 7,32 |
| Moncloa-Aravaca | 27.366 | 21,78 | 4,38 | 14 | 64,19 | 2,62 | 6,83 |
| Latina | 19.193 | 24,32 | 4,66 | 24 | 32,64 | 2,53 | 11,28 |
| Carabanchel | 17.930 | 18,76 | 3,92 | 30 | 28,26 | 2,68 | 12,10 |
| Usera | 16.396 | 16,66 | 3,78 | 33 | 20,53 | 2,85 | 13,17 |
| Puente de Vallecas | 16.167 | 17,47 | 3,78 | 28 | 17,43 | 2,69 | 13,72 |
| Moratalaz | 21.349 | 26,03 | 5,40 | 16 | 38,24 | 2,53 | 10,62 |
| Ciudad Lineal | 21.836 | 22,63 | 4,97 | 23 | 44,38 | 2,51 | 9,72 |
| Hortaleza | 24.638 | 18,40 | 3,01 | 14 | 52,86 | 2,69 | 8,04 |
| Villaverde | 16.483 | 16,80 | 3,29 | 30 | 19,65 | 2,84 | 13,93 |
| Villa de Vallecas | 19.881 | 12,47 | 1,90 | 19 | 31,53 | 2,64 | 11,19 |
| Vicálvaro | 19.312 | 14,27 | 2,31 | 17 | 31,49 | 2,76 | 10,88 |
| San Blas-Canillejas | 19.973 | 17,34 | 3,95 | 20 | 34,68 | 2,66 | 10,44 |
| Barajas | 25.747 | 17,80 | 2,28 | 13 | 51,39 | 2,69 | 7,65 |

*Fuente:* Servicio de Estadística Municipal, Padrón Continuo de Habitantes; elaboración propia.

*Nota:* Renta bruta disponible per cápita de 2017 (€/año por persona) (RBDpc 17); Porcentaje de población de 65 y más años y de 80 y más años sobre el total de población (65+ y 80+); Porcentaje de inmigrantes económicos (nacidos en un país distinto de España, UE-15 más Suiza y Noruega, EE.UU., Canadá, Japón, Australia y Nueva Zelanda) (IE); Porcentaje de población de 25-64 años con estudios terminados por encima de educación secundaria (+ ES); Media de personas por hogar (P/H); Tasa de paro registrado (TPR: nº de desempleados por distrito/población 16-65 años) (%).

**Apéndice B**

**Tabla B.I**

Esperanza de vida al nacer (EVN), distritos municipales, 2019 y 2020. Hombres y mujeres. Años con sus intervalos de confianza del 95% (IC95%)

|  | **Hombres** | | | | | |  | **Mujeres** | | | | | |
| --- | --- | --- | --- | --- | --- | --- | --- | --- | --- | --- | --- | --- | --- |
| **Distritos** | **EVN 2019** | **IC95% inf.** | **IC95% sup.** | **EVN 2020** | **IC95% inf.** | **IC95% sup.** |  | **EVN 2019** | **IC95% inf.** | **IC95% sup.** | **EVN 2020** | **IC95% inf.** | **IC95% sup.** |
| Centro | 81,95 | 80,76 | 83,14 | 79,53 | 78,56 | 80,51 |  | 87,39 | 86,14 | 88,64 | 85,76 | 84,95 | 86,57 |
| Arganzuela | 83,56 | 82,46 | 84,67 | 79,03 | 78,13 | 79,94 |  | 88,13 | 87,37 | 88,89 | 85,63 | 84,96 | 86,30 |
| Retiro | 84,21 | 83,00 | 85,42 | 80,48 | 79,54 | 81,43 |  | 88,22 | 87,26 | 89,19 | 86,12 | 85,33 | 86,91 |
| Salamanca | 83,26 | 82,18 | 84,35 | 81,16 | 80,36 | 81,97 |  | 87,81 | 87,01 | 88,61 | 85,94 | 85,28 | 86,60 |
| Chamartín | 84,60 | 83,49 | 85,70 | 80,41 | 79,54 | 81,27 |  | 89,07 | 88,09 | 90,05 | 85,16 | 84,34 | 85,98 |
| Tetuán | 82,87 | 81,74 | 83,99 | 78,15 | 77,33 | 78,96 |  | 87,55 | 86,63 | 88,47 | 84,57 | 83,74 | 85,40 |
| Chamberí | 84,42 | 82,91 | 85,94 | 80,63 | 79,68 | 81,57 |  | 88,13 | 87,26 | 89,01 | 86,28 | 85,50 | 87,05 |
| Fuencarral-El Pardo | 82,98 | 82,03 | 83,93 | 79,90 | 79,24 | 80,56 |  | 88,00 | 87,29 | 88,70 | 85,29 | 84,72 | 85,86 |
| Moncloa-Aravaca | 82,60 | 81,43 | 83,77 | 79,80 | 78,72 | 80,87 |  | 87,59 | 86,67 | 88,51 | 85,13 | 84,19 | 86,08 |
| Latina | 83,33 | 82,19 | 84,47 | 78,98 | 78,30 | 79,66 |  | 88,51 | 87,73 | 89,29 | 85,75 | 85,16 | 86,35 |
| Carabanchel | 83,12 | 82,19 | 84,06 | 78,65 | 77,95 | 79,36 |  | 87,34 | 86,61 | 88,07 | 84,29 | 83,69 | 84,88 |
| Usera | 82,01 | 80,86 | 83,15 | 78,11 | 77,20 | 79,02 |  | 86,91 | 85,98 | 87,85 | 84,63 | 83,79 | 85,48 |
| Puente de Vallecas | 81,38 | 80,42 | 82,34 | 77,11 | 76,39 | 77,82 |  | 87,12 | 86,39 | 87,85 | 83,94 | 83,24 | 84,64 |
| Moratalaz | 82,89 | 81,57 | 84,21 | 78,71 | 77,68 | 79,75 |  | 88,67 | 87,62 | 89,71 | 86,00 | 85,12 | 86,87 |
| Ciudad Lineal | 84,41 | 83,41 | 85,42 | 79,87 | 79,15 | 80,58 |  | 88,90 | 88,17 | 89,63 | 85,53 | 84,87 | 86,19 |
| Hortaleza | 82,93 | 81,95 | 83,91 | 80,22 | 79,45 | 80,99 |  | 88,16 | 87,32 | 89,00 | 86,03 | 85,42 | 86,64 |
| Villaverde | 82,54 | 81,34 | 83,75 | 78,70 | 77,84 | 79,56 |  | 86,82 | 85,76 | 87,88 | 84,60 | 83,74 | 85,45 |
| Villa de Vallecas | 81,72 | 80,44 | 83,00 | 77,69 | 76,74 | 78,64 |  | 86,05 | 84,84 | 87,25 | 83,46 | 82,49 | 84,43 |
| Vicálvaro | 81,52 | 79,89 | 83,14 | 79,27 | 78,04 | 80,50 |  | 86,77 | 85,11 | 88,42 | 84,21 | 83,09 | 85,33 |
| San Blas-Canillejas | 81,17 | 80,17 | 82,16 | 78,78 | 78,00 | 79,56 |  | 87,43 | 86,54 | 88,33 | 85,49 | 84,72 | 86,26 |
| Barajas | 82,98 | 81,09 | 84,87 | 81,21 | 79,80 | 82,63 |  | 87,99 | 86,38 | 89,61 | 85,60 | 84,34 | 86,87 |

*Fuente:* defunciones y población por edad y sexo del Servicio de Estadística Municipal, Padrón Continuo de Habitantes; elaboración propia.

**Tabla B.II**

Esperanza de vida a los 65 años (EV65), distritos municipales, 2019 y 2020. Hombres y mujeres. Años con sus intervalos de confianza del 95% (IC95%)

|  | **Hombres** | | | | | |  | **Mujeres** | | | | | |
| --- | --- | --- | --- | --- | --- | --- | --- | --- | --- | --- | --- | --- | --- |
| **Distritos** | **EV65 2019** | **IC95% inf.** | **IC95% sup.** | **EV65 2020** | **IC95% inf.** | **IC95% sup.** |  | **EV65 2019** | **IC95% inf.** | **IC95% sup.** | **EV65 2020** | **IC95% inf.** | **IC95% sup.** |
| Centro | 20,90 | 19,87 | 21,92 | 17,72 | 16,99 | 18,46 |  | 25,70 | 24,67 | 26,73 | 22,64 | 21,97 | 23,32 |
| Arganzuela | 21,54 | 20,61 | 22,47 | 17,53 | 16,94 | 18,13 |  | 24,75 | 24,09 | 25,42 | 22,18 | 21,63 | 22,73 |
| Retiro | 22,26 | 21,18 | 23,33 | 18,73 | 18,12 | 19,34 |  | 25,63 | 24,93 | 26,33 | 22,66 | 22,11 | 23,20 |
| Salamanca | 21,58 | 20,75 | 22,41 | 18,39 | 17,76 | 19,03 |  | 24,73 | 24,09 | 25,37 | 22,60 | 22,07 | 23,13 |
| Chamartín | 22,61 | 21,67 | 23,55 | 18,51 | 17,90 | 19,11 |  | 26,22 | 25,44 | 26,99 | 22,46 | 21,93 | 22,99 |
| Tetuán | 21,48 | 20,53 | 22,43 | 16,65 | 16,05 | 17,26 |  | 25,14 | 24,38 | 25,90 | 22,42 | 21,87 | 22,97 |
| Chamberí | 22,96 | 21,52 | 24,41 | 18,82 | 18,18 | 19,45 |  | 25,18 | 24,55 | 25,81 | 23,44 | 22,92 | 23,96 |
| Fuencarral-El Pardo | 21,56 | 20,72 | 22,40 | 18,34 | 17,90 | 18,77 |  | 24,80 | 24,23 | 25,37 | 22,30 | 21,87 | 22,72 |
| Moncloa-Aravaca | 21,10 | 20,18 | 22,03 | 18,77 | 18,09 | 19,44 |  | 24,87 | 24,12 | 25,62 | 22,27 | 21,69 | 22,86 |
| Latina | 23,05 | 22,02 | 24,07 | 18,02 | 17,56 | 18,48 |  | 26,02 | 25,39 | 26,66 | 23,06 | 22,65 | 23,47 |
| Carabanchel | 21,61 | 20,77 | 22,44 | 17,32 | 16,83 | 17,81 |  | 24,84 | 24,27 | 25,41 | 21,65 | 21,21 | 22,09 |
| Usera | 20,63 | 19,61 | 21,65 | 16,70 | 15,98 | 17,41 |  | 24,06 | 23,26 | 24,85 | 21,96 | 21,31 | 22,61 |
| Puente de Vallecas | 20,72 | 19,84 | 21,60 | 16,68 | 16,15 | 17,21 |  | 24,54 | 23,93 | 25,16 | 21,73 | 21,25 | 22,21 |
| Moratalaz | 21,50 | 20,49 | 22,50 | 17,65 | 16,95 | 18,35 |  | 25,66 | 24,74 | 26,58 | 23,17 | 22,56 | 23,77 |
| Ciudad Lineal | 22,65 | 21,74 | 23,56 | 18,42 | 17,92 | 18,92 |  | 25,80 | 25,21 | 26,39 | 22,75 | 22,31 | 23,19 |
| Hortaleza | 21,17 | 20,31 | 22,03 | 18,24 | 17,69 | 18,79 |  | 25,22 | 24,52 | 25,92 | 22,54 | 22,04 | 23,04 |
| Villaverde | 21,51 | 20,46 | 22,57 | 16,99 | 16,32 | 17,67 |  | 24,81 | 24,00 | 25,62 | 22,06 | 21,46 | 22,65 |
| Villa de Vallecas | 19,87 | 18,73 | 21,00 | 15,79 | 15,05 | 16,53 |  | 23,70 | 22,63 | 24,77 | 20,68 | 19,91 | 21,44 |
| Vicálvaro | 20,68 | 19,31 | 22,06 | 17,94 | 16,96 | 18,93 |  | 24,65 | 23,39 | 25,91 | 21,34 | 20,36 | 22,31 |
| San Blas-Canillejas | 19,65 | 18,81 | 20,49 | 16,98 | 16,33 | 17,63 |  | 24,80 | 24,07 | 25,53 | 22,61 | 22,04 | 23,19 |
| Barajas | 20,80 | 19,31 | 22,29 | 18,58 | 17,52 | 19,64 |  | 24,74 | 23,26 | 26,23 | 22,61 | 21,59 | 23,63 |

*Fuente:* defunciones y población por edad y sexo del Servicio de Estadística Municipal, Padrón Continuo de Habitantes; elaboración propia.

**Apéndice C**

**Tabla C.I**

Coeficientes de correlación de Pearson significativos según el cálculo estadístico (p <0,05) entre diferentes variables independientes y las caídas brutas (CB) de la esperanza de vida al nacer EVN y a los 65 años (EV65) en 2020 respecto a 2019. Distritos de la ciudad de Madrid

|  | **CB EVN hombres** | **CB EV65 hombres** |
| --- | --- | --- |
| 80+ | 0,37 | NS |
| IE | 0,38 | 0,52 |
| TPR | NS | 0,41 |

NS: no significativo.

**Apéndice D**

**Tabla D.I**

Tabla de mortalidad 2020. Ciudad de Madrid. Hombres

| **Edad (años)** | **ax** | **Población** | **Defunciones** | **Mx** | **qx** | **px** | **lx** | **dx** | **Lx** | **Tx** | **ex** |
| --- | --- | --- | --- | --- | --- | --- | --- | --- | --- | --- | --- |
| <1 | 0,10 | 14020,00 | 26,00 | 0,002 | 0,00 | 1,00 | 100000,00 | 185,14 | 99833,37 | 7930799,87 | 79,31 |
| 1-4 | 0,50 | 58125,00 | 8,00 | 0,000 | 0,00 | 1,00 | 99814,86 | 54,94 | 399149,57 | 7830966,50 | 78,45 |
| 5-9 | 0,50 | 74933,00 | 4,00 | 0,000 | 0,00 | 1,00 | 99759,92 | 26,62 | 498733,06 | 7431816,93 | 74,50 |
| 10-14 | 0,50 | 76211,00 | 7,00 | 0,000 | 0,00 | 1,00 | 99733,30 | 45,79 | 498552,02 | 6933083,88 | 69,52 |
| 15-19 | 0,50 | 75654,00 | 13,00 | 0,000 | 0,00 | 1,00 | 99687,51 | 85,61 | 498223,51 | 6434531,86 | 64,55 |
| 20-24 | 0,50 | 83548,00 | 20,00 | 0,000 | 0,00 | 1,00 | 99601,90 | 119,14 | 497711,62 | 5936308,35 | 59,60 |
| 25-29 | 0,50 | 104783,00 | 39,00 | 0,000 | 0,00 | 1,00 | 99482,75 | 184,96 | 496951,35 | 5438596,73 | 54,67 |
| 30-34 | 0,50 | 112704,00 | 45,00 | 0,000 | 0,00 | 1,00 | 99297,79 | 198,04 | 495993,84 | 4941645,38 | 49,77 |
| 35-39 | 0,50 | 121512,00 | 88,00 | 0,001 | 0,00 | 1,00 | 99099,75 | 358,20 | 494603,26 | 4445651,54 | 44,86 |
| 40-44 | 0,50 | 131465,00 | 104,00 | 0,001 | 0,00 | 1,00 | 98741,55 | 389,79 | 492733,28 | 3951048,28 | 40,01 |
| 45-49 | 0,50 | 127899,00 | 231,00 | 0,002 | 0,01 | 0,99 | 98351,76 | 884,18 | 489548,35 | 3458315,00 | 35,16 |
| 50-54 | 0,50 | 118438,00 | 432,00 | 0,004 | 0,02 | 0,98 | 97467,58 | 1761,49 | 482934,17 | 2968766,65 | 30,46 |
| 55-59 | 0,50 | 106741,00 | 717,00 | 0,007 | 0,03 | 0,97 | 95706,09 | 3161,29 | 470627,21 | 2485832,48 | 25,97 |
| 60-64 | 0,50 | 86784,00 | 895,00 | 0,010 | 0,05 | 0,95 | 92544,79 | 4652,11 | 451093,69 | 2015205,27 | 21,78 |
| 65-69 | 0,50 | 66488,00 | 1081,00 | 0,016 | 0,08 | 0,92 | 87892,68 | 6865,97 | 422298,49 | 1564111,58 | 17,80 |
| 70-74 | 0,50 | 61723,00 | 1648,00 | 0,027 | 0,13 | 0,87 | 81026,71 | 10140,18 | 379783,10 | 1141813,10 | 14,09 |
| 75-79 | 0,50 | 53012,00 | 2356,00 | 0,044 | 0,20 | 0,80 | 70886,53 | 14176,82 | 318990,58 | 762030,00 | 10,75 |
| 80-84 | 0,50 | 37954,00 | 3067,00 | 0,081 | 0,34 | 0,66 | 56709,70 | 19062,14 | 235893,18 | 443039,42 | 7,81 |
| 85-89 | 0,50 | 28977,00 | 4098,00 | 0,141 | 0,52 | 0,48 | 37647,57 | 19667,50 | 139069,08 | 207146,24 | 5,50 |
| 90-94 | 0,50 | 11160,00 | 2672,00 | 0,239 | 0,75 | 0,25 | 17980,07 | 13464,89 | 56238,10 | 68077,16 | 3,79 |
| 95-99 | 0,50 | 2329,00 | 886,00 | 0,380 | 0,97 | 0,03 | 4515,17 | 4401,90 | 11571,13 | 11839,05 | 2,62 |
| 100+ | 0,50 | 272,00 | 115,00 | 0,423 | 1,00 | 0,00 | 113,28 | 113,28 | 267,92 | 267,92 | 2,37 |

ax: promedio de años vividos el último año de vida de los que mueren con edad cumplida x; Mx: tasa específica de mortalidad a la edad x; px: probabilidad o riesgo de sobrevivir con edad cumplida x; lx: supervivientes a la edad exacta x; dx: defunciones teóricas con edad x; Lx: población estacionaria a la edad x; Tx: total de años vividos desde la edad x; ex: esperanza de vida a la edad x.

**Tabla D.II**

Tabla de mortalidad 2020. Ciudad de Madrid. Mujeres

| **Edad (años)** | **ax** | **población** | **defunciones** | **Mx** | **qx** | **px** | **lx** | **dx** | **Lx** | **Tx** | **ex** |
| --- | --- | --- | --- | --- | --- | --- | --- | --- | --- | --- | --- |
| <1 | 0,10 | 13250,00 | 17,00 | 0,001 | 0,00 | 1,00 | 100000,00 | 128,15 | 99884,66 | 8525178,81 | 85,25 |
| 1-4 | 0,50 | 55679,00 | 5,00 | 0,000 | 0,00 | 1,00 | 99871,85 | 35,87 | 399415,65 | 8425294,15 | 84,36 |
| 5-9 | 0,50 | 71874,00 | 2,00 | 0,000 | 0,00 | 1,00 | 99835,98 | 13,89 | 499145,17 | 8025878,50 | 80,39 |
| 10-14 | 0,50 | 72662,00 | 10,00 | 0,000 | 0,00 | 1,00 | 99822,09 | 68,67 | 498938,78 | 7526733,33 | 75,40 |
| 15-19 | 0,50 | 72796,00 | 8,00 | 0,000 | 0,00 | 1,00 | 99753,42 | 54,80 | 498630,12 | 7027794,55 | 70,45 |
| 20-24 | 0,50 | 86661,00 | 10,00 | 0,000 | 0,00 | 1,00 | 99698,63 | 57,51 | 498349,36 | 6529164,43 | 65,49 |
| 25-29 | 0,50 | 114460,00 | 14,00 | 0,000 | 0,00 | 1,00 | 99641,12 | 60,92 | 498053,30 | 6030815,06 | 60,53 |
| 30-34 | 0,50 | 120411,00 | 29,00 | 0,000 | 0,00 | 1,00 | 99580,20 | 119,84 | 497601,40 | 5532761,76 | 55,56 |
| 35-39 | 0,50 | 127734,00 | 62,00 | 0,000 | 0,00 | 1,00 | 99460,36 | 241,09 | 496699,07 | 5035160,36 | 50,62 |
| 40-44 | 0,50 | 138256,00 | 84,00 | 0,001 | 0,00 | 1,00 | 99219,27 | 300,96 | 495343,95 | 4538461,29 | 45,74 |
| 45-49 | 0,50 | 136279,00 | 147,00 | 0,001 | 0,01 | 0,99 | 98918,31 | 532,07 | 493261,40 | 4043117,34 | 40,87 |
| 50-54 | 0,50 | 131744,00 | 240,00 | 0,002 | 0,01 | 0,99 | 98386,25 | 892,10 | 489701,00 | 3549855,94 | 36,08 |
| 55-59 | 0,50 | 124705,00 | 357,00 | 0,003 | 0,01 | 0,99 | 97494,15 | 1385,59 | 484006,77 | 3060154,94 | 31,39 |
| 60-64 | 0,50 | 106359,00 | 531,00 | 0,005 | 0,02 | 0,98 | 96108,56 | 2369,55 | 474618,92 | 2576148,17 | 26,80 |
| 65-69 | 0,50 | 87607,00 | 660,00 | 0,008 | 0,04 | 0,96 | 93739,01 | 3465,71 | 460030,79 | 2101529,24 | 22,42 |
| 70-74 | 0,50 | 86467,00 | 980,00 | 0,011 | 0,06 | 0,94 | 90273,30 | 4974,74 | 438929,66 | 1641498,46 | 18,18 |
| 75-79 | 0,50 | 78190,00 | 1573,00 | 0,020 | 0,10 | 0,90 | 85298,56 | 8169,18 | 406069,86 | 1202568,80 | 14,10 |
| 80-84 | 0,50 | 63569,00 | 2781,00 | 0,044 | 0,20 | 0,80 | 77129,38 | 15207,90 | 347627,16 | 796498,94 | 10,33 |
| 85-89 | 0,50 | 54714,00 | 4610,00 | 0,084 | 0,35 | 0,65 | 61921,48 | 21547,58 | 255738,46 | 448871,78 | 7,25 |
| 90-94 | 0,50 | 27515,00 | 4719,00 | 0,172 | 0,60 | 0,40 | 40373,90 | 24232,04 | 141289,40 | 193133,32 | 4,78 |
| 95-99 | 0,50 | 7840,00 | 2354,00 | 0,300 | 0,86 | 0,14 | 16141,86 | 13842,60 | 46102,79 | 51843,92 | 3,21 |
| 100+ | 0,50 | 1226,00 | 491,00 | 0,400 | 1,00 | 0,00 | 2299,26 | 2299,26 | 5741,12 | 5741,12 | 2,50 |

ax: promedio de años vividos el último año de vida de los que mueren con edad cumplida x; Mx: tasa específica de mortalidad a la edad x; px: probabilidad o riesgo de sobrevivir con edad cumplida x; lx: supervivientes a la edad exacta x; dx: defunciones teóricas con edad x; Lx: población estacionaria a la edad x; Tx: total de años vividos desde la edad x; ex: esperanza de vida a la edad x.
